# Supplementary material for: Factors associated with aberrant imprint methylation and oligozoospermia
Source: PubMed Central journal article supplement (PMC5301220; doi:10.1038/srep42336), 2017-02-10
Supplement: srep42336-s1.pdf [file srep42336-s1.pdf]

## Supplementary information

### Factors associated with aberrant imprint methylation and oligozoospermia

Norio Kobayashi<sup>1,2,#</sup>, Naoko Miyauchi<sup>1,#</sup>, Nozomi Tatsuta<sup>3</sup>, Akane Kitamura<sup>1</sup>, Hiroaki Okae<sup>1</sup>, Hitoshi Hiura<sup>1</sup>, Akiko Sato<sup>1,4</sup>, Takafumi Utsunomiya<sup>4</sup>, Nobuo Yaegashi<sup>5</sup>, Kunihiro Nakai<sup>3</sup>, Takahiro Arima<sup>1,\*</sup>

<sup>1</sup>Department of Informative Genetics, Tohoku University Graduate School of Medicine, 2-1 Seiryō-cho, Aoba-ku, Sendai, 980-8575, Japan

<sup>2</sup>Laboratory of Animal Reproduction and Development, Graduate School of Agricultural Science, Tohoku University, 1-1 Amamiya-machi, Tsutsumidori, Aoba-ku, Sendai, 981-8555, Japan

<sup>3</sup>Department of Development and Environmental Medicine, Tohoku University Graduate School of Medicine, Sendai, 980-8575, Japan

<sup>4</sup>St. Luke Clinic, Oita, 870-0823, Japan

<sup>5</sup>Departments of Obstetrics and Gynecology, Tohoku University Graduate School of Medicine, Sendai, 980-8574, Japan

#These authors contributed equally to this work

\*To whom correspondence should be addressed

TEL: ++81 22 717 7844;

FAX: ++81 22 717 7063;

Email: [tarima@med.tohoku.ac.jp](mailto:tarima@med.tohoku.ac.jp)

## Supplementary information

- 1. Supplemental Figure S1. Aberrant DNA methylation of imprinted loci in sperm from infertile men.** (A) The frequency of abnormally imprinted loci. 24.8% (55/221) were found to have abnormal imprint methylation and about half of the cases with aberrant methylation had it in one locus. (B) The frequency of methylation errors in each imprinted locus. White bars indicate 3 paternally methylated gDMR (pgDMR) and black bars indicate 19 maternally methylated gDMR (mgDMR). The Y-axis indicates the frequency of imprinted methylation errors (%) (C) Association between abnormal methylation samples and the sperm concentration, sperm motility rate and sperm malformation rate. The Y-axis indicates the frequency of patients with abnormal imprint methylation (%) for each sperm parameters. Normal: Normozoospermia ( $20 \times 10^6/\text{ml}$ ), Moderate: Moderate oligozoospermia ( $5\text{--}20 \times 10^6/\text{ml}$ ), Severe: Severe oligozoospermia ( $5 \times 10^6/\text{ml}$ ). \* $P < 0.05$ , \*\* $P < 0.01$ .
- 2. Supplemental Table S1. Factors associated with the presence and absence of imprint methylation errors.** Data are shown as mean $\pm$ SD. Numbers within brackets indicate the number of patients studied. \* $P < 0.05$ , \*\* $P < 0.01$ .
- 3. Supplemental Table S2. Comparison of the associated factors according to sperm concentration.** Data are shown as mean $\pm$ SD. Numbers within brackets indicate the number of patients studied. The three classifications were normozoospermia, moderate oligozoospermia and severe oligozoospermia. \* $P < 0.05$ , \*\* $P < 0.01$ .
- 4. Supplemental Table S3. Raw data from our study.** Table S3 shows imprinted methylation profiles, sperm properties, lifestyle and food/drink intakes and serum PCBs and hormone levels in each subject. Data are shown as + ( $\geq 80\%$  methylation), - ( $\leq 20\%$  methylation) and ND (not determined).

# Supplemental Figure S1

**A**

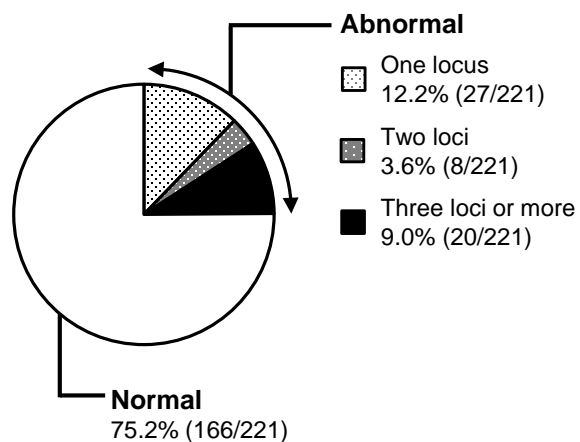

**B**

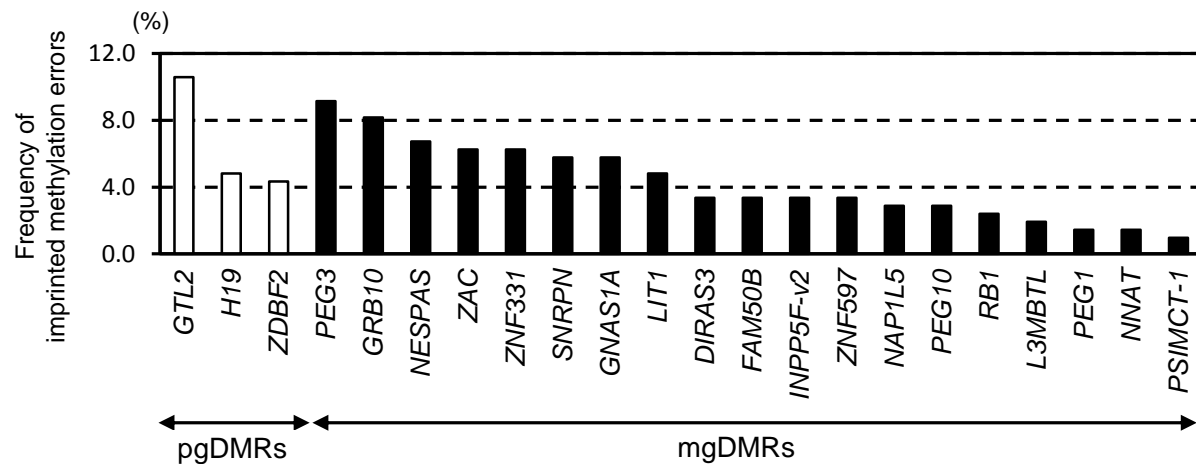

**C**

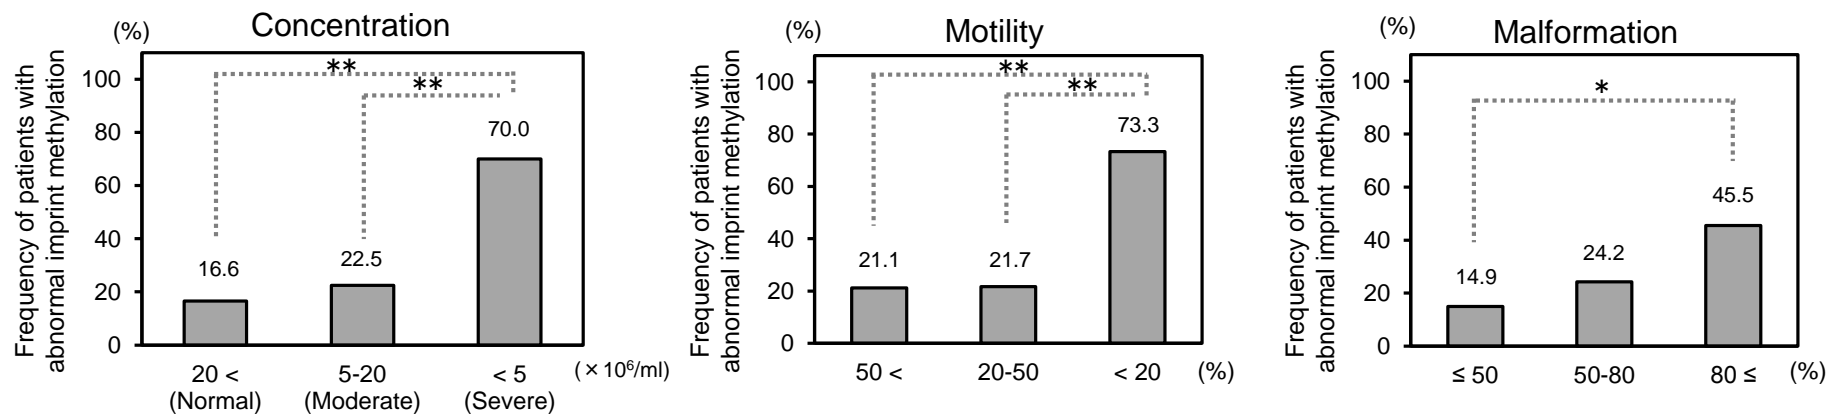

Supplemental Table S1. Factors associated with the presence and absence of imprint methylation errors

|                                        | Imprinted methylation |                 | P-value    |
|----------------------------------------|-----------------------|-----------------|------------|
|                                        | Normal (n=166)        | Abnormal (n=55) |            |
| <b>Sperm parameters</b>                |                       |                 |            |
| Abstinence period (days)               | 4.8±2.8               | 6.0±7.9         | 0.266      |
| ≤4.0                                   | 57.3%                 | 47.3%           | 0.195      |
| 4.0<                                   | 42.7%                 | 52.7%           |            |
| Volume (ml)                            | 3.4±1.5               | 3.0±1.6         | 0.094      |
| ≤3.0                                   | 49.7%                 | 58.2%           | 0.275      |
| 3.0<                                   | 50.3%                 | 41.8%           |            |
| Concentration (10 <sup>6</sup> /ml)    | 50.5±44.5             | 32.2±41.0       | < 0.001 ** |
| <5.0                                   | 5.4%                  | 38.2%           | < 0.001 ** |
| 5.0≤                                   | 94.6%                 | 61.8%           |            |
| Motility (%)                           | 52.9±19.0             | 43.9±23.4       | 0.026 *    |
| ≤53.0                                  | 49.4%                 | 65.5%           | 0.039 *    |
| 53.0<                                  | 50.6%                 | 34.5%           |            |
| Malformation (%)                       | 58.4±10.9             | 60.1±11.8       | 0.251      |
| ≤58.0                                  | 55.2%                 | 48.0%           | 0.375      |
| 58.0<                                  | 44.8%                 | 52.0%           |            |
| <b>Physical parameters</b>             |                       |                 |            |
| Age (year)                             | 35.4±5.4              | 36.5±6.1        | 0.230      |
| ≤35                                    | 51.8%                 | 45.5%           | 0.413      |
| 35<                                    | 48.2%                 | 54.5%           |            |
| Height (cm)                            | 171.0±5.8             | 172.3±5.4       | 0.223      |
| ≤171.0                                 | 53.7%                 | 47.3%           | 0.412      |
| 171.0<                                 | 46.3%                 | 52.7%           |            |
| Body weight (kg)                       | 70.6±11.2             | 71.6±9.6        | 0.449      |
| ≤70.0                                  | 52.4%                 | 52.7%           | 0.970      |
| 70.0<                                  | 47.6%                 | 47.3%           |            |
| BMI (kg/m <sup>2</sup> )               | 24.1±3.4              | 24.2±3.4        | 0.812      |
| ≤23.8                                  | 50.0%                 | 49.1%           | 0.907      |
| 23.8<                                  | 50.0%                 | 50.9%           |            |
| Sleeping time (hours)                  | 6.7±0.8               | 6.6±0.8         | 0.464      |
| ≤7.0                                   | 84.2%                 | 88.6%           | 0.467      |
| 7.0<                                   | 15.8%                 | 11.4%           |            |
| Annual income (million yen)            | 4.8±2.3               | 4.7±1.7         | 0.670      |
| ≤4.0                                   | 52.6%                 | 52.4%           | 0.984      |
| 4.0<                                   | 47.4%                 | 47.6%           |            |
| Education (%)                          |                       |                 |            |
| High school or less                    | 29.2%                 | 27.3%           | 0.806      |
| College, University or Graduate school | 70.8%                 | 72.7%           |            |
| Residence (%)                          |                       |                 |            |
| Farming or fishing village             | 19.4%                 | 4.5%            | 0.019 *    |
| Residential district or others         | 80.6%                 | 95.5%           |            |
| <b>Lifestyle parameters</b>            |                       |                 |            |
| Smoking (%)                            |                       |                 |            |
| Current smoker                         | 23.6%                 | 31.1%           | 0.312      |
| Never smoker or ex-smoker              | 76.4%                 | 68.9%           |            |

|                                         |       |       |         |
|-----------------------------------------|-------|-------|---------|
| Exercise (%)                            |       |       |         |
| Exerciser                               | 53.6% | 31.8% | 0.012 * |
| Non-exerciser                           | 46.4% | 68.2% |         |
| <hr/>                                   |       |       |         |
| Materials used in work in the past      |       |       |         |
| Pesticide (%)                           |       |       |         |
| Used                                    | 10.0% | 0.0%  | 0.054   |
| Not used                                | 88.6% | 97.7% |         |
| Unknown                                 | 1.4%  | 2.3%  |         |
| PCB or dioxin (%)                       |       |       |         |
| Used                                    | 4.3%  | 0.0%  | 0.527   |
| Not used                                | 87.1% | 90.9% |         |
| Unknown                                 | 8.6%  | 9.1%  |         |
| Radioactive material (%)                |       |       |         |
| Used                                    | 9.3%  | 9.1%  | 0.767   |
| Not used                                | 87.9% | 86.4% |         |
| Unknown                                 | 2.9%  | 4.5%  |         |
| <hr/>                                   |       |       |         |
| Things used for more than half a day    |       |       |         |
| Chlorine bleach, insecticide (%)        |       |       |         |
| None                                    | 87.0% | 85.4% | 0.791   |
| 1-3 times/month or more                 | 13.0% | 14.6% |         |
| Medical disinfectant (%)                |       |       |         |
| None                                    | 89.5% | 82.9% | 0.262   |
| 1-3 times/month or more                 | 10.5% | 17.1% |         |
| Permanent marker (%)                    |       |       |         |
| None                                    | 63.4% | 61.0% | 0.780   |
| 1-3 times/month or more                 | 36.6% | 39.0% |         |
| Aqueous magic inks, ink-jet printer (%) |       |       |         |
| None                                    | 69.9% | 65.9% | 0.626   |
| 1-3 times/month or more                 | 30.1% | 34.1% |         |
| Organic solvent (%)                     |       |       |         |
| None                                    | 82.9% | 85.0% | 0.759   |
| 1-3 times/month or more                 | 17.1% | 15.0% |         |
| Copy machine, laser printer (%)         |       |       |         |
| None                                    | 49.2% | 51.2% | 0.822   |
| 1-3 times/month or more                 | 50.8% | 48.8% |         |
| Lubricating oil (%)                     |       |       |         |
| None                                    | 91.9% | 95.1% | 0.496   |
| 1-3 times/month or more                 | 8.1%  | 4.9%  |         |
| Insecticide (%)                         |       |       |         |
| None                                    | 89.5% | 95.1% | 0.279   |
| 1-3 times/month or more                 | 10.5% | 4.9%  |         |
| Radioactive material, isotope (%)       |       |       |         |
| None                                    | 95.2% | 87.8% | 0.102   |
| 1-3 times/month or more                 | 4.8%  | 12.2% |         |
| <hr/>                                   |       |       |         |
| Dietary habit                           |       |       |         |
| Meals (%)                               |       |       |         |
| Twice per day                           | 23.0% | 11.6% | 0.105   |
| Three times per day                     | 77.0% | 88.4% |         |
| Eat regularly (%)                       |       |       |         |
| Yes                                     | 64.0% | 69.8% | 0.489   |
| No                                      | 36.0% | 30.2% |         |

|                             |       |       |       |
|-----------------------------|-------|-------|-------|
| Rice daily averag (%)       |       |       |       |
| 1 bowl/day or less          | 30.2% | 30.2% | 0.998 |
| 2-3 bowls/day or more       | 69.8% | 69.8% |       |
| Miso soup daily average (%) |       |       |       |
| 1 bowl/day or less          | 69.4% | 76.2% | 0.398 |
| 2 bowls/day or more         | 30.6% | 23.8% |       |
| Confections (%)             |       |       |       |
| 1-2 times/week or less      | 60.7% | 61.9% | 0.893 |
| 3-4 times/week or more      | 39.3% | 38.1% |       |
| Meat (%)                    |       |       |       |
| 3-4 times/week or less      | 74.3% | 67.4% | 0.382 |
| 5-6 times/week or more      | 25.7% | 32.6% |       |
| Fish (%)                    |       |       |       |
| 1-2 times/week or less      | 64.0% | 54.8% | 0.283 |
| 3-4 times/week or more      | 36.0% | 45.2% |       |
| Vegetable (%)               |       |       |       |
| 5-6 times/week or less      | 52.6% | 57.1% | 0.606 |
| Every day                   | 47.4% | 42.9% |       |
| Fruit (%)                   |       |       |       |
| 1-2 times/week or less      | 73.1% | 73.2% | 0.996 |
| 3-4 times/week or more      | 26.9% | 26.8% |       |
| Fry (%)                     |       |       |       |
| 1-2 times/week or less      | 60.3% | 50.0% | 0.238 |
| 3-4 times/week or more      | 39.7% | 50.0% |       |
| Eat out (%)                 |       |       |       |
| 1-2 times/week or less      | 78.7% | 74.4% | 0.559 |
| 3-4 times/week or more      | 21.3% | 25.6% |       |
| Precooked food (%)          |       |       |       |
| 1-3 times/month or less     | 57.5% | 67.4% | 0.245 |
| 1-2 times/week or more      | 42.5% | 32.6% |       |
| Soy food (%)                |       |       |       |
| 1-2 times/week or less      | 48.1% | 62.8% | 0.094 |
| 3-4 times/week or more      | 51.9% | 37.2% |       |
| Vitamin compound (%)        |       |       |       |
| Currently taking            | 11.9% | 11.6% | 0.968 |
| Never take                  | 88.1% | 88.4% |       |
| Milk (%)                    |       |       |       |
| 1-3 times/month or less     | 62.7% | 61.4% | 0.875 |
| 1-2 times/week or more      | 37.3% | 38.6% |       |
| Green tea (%)               |       |       |       |
| 3-4 times/week or less      | 57.0% | 45.5% | 0.181 |
| 5-6 times/week or more      | 43.0% | 54.5% |       |
| Oolong tea (%)              |       |       |       |
| 1-3 times/month or less     | 57.5% | 63.6% | 0.470 |
| 1-2 times/week or more      | 42.5% | 36.4% |       |
| 100% fruit juice (%)        |       |       |       |
| 1-3 times/month or less     | 76.9% | 72.7% | 0.578 |
| 1-2 times/week or more      | 23.1% | 27.3% |       |
| Vegetable juice (%)         |       |       |       |
| 1-3 times/month or less     | 78.4% | 83.7% | 0.447 |
| 1-2 times/week or more      | 21.6% | 16.3% |       |

|                         |           |           |       |
|-------------------------|-----------|-----------|-------|
| Lactin acid drink (%)   |           |           |       |
| 1-3 times/month or less | 81.3%     | 75.0%     | 0.363 |
| 1-2 times/week or more  | 18.7%     | 25.0%     |       |
| Sports drink (%)        |           |           |       |
| 1-3 times/month or less | 67.9%     | 79.5%     | 0.141 |
| 1-2 times/week or more  | 32.1%     | 20.5%     |       |
| Coffee (%)              |           |           |       |
| 5-6 times/week or less  | 54.4%     | 40.9%     | 0.119 |
| Every day               | 45.6%     | 59.1%     |       |
| Carbonated drink (%)    |           |           |       |
| 1-2 times/week or less  | 81.1%     | 75.0%     | 0.388 |
| 3-4 times/week or more  | 18.9%     | 25.0%     |       |
| <hr/>                   |           |           |       |
| PCB (ng/g fat)          |           |           |       |
| Total PCB               | 62.4±41.5 | 59.7±42.6 | 0.696 |
| ≤51.9                   | 50.0%     | 50.9%     | 0.920 |
| 51.9<                   | 50.0%     | 49.1%     |       |
| #70/80                  | 3.3±1.9   | 3.3±2.6   | 0.399 |
| #99                     | 2.8±2.0   | 2.7±1.9   | 0.931 |
| #118                    | 3.2±2.7   | 3.6±2.7   | 0.354 |
| #153                    | 7.7±7.3   | 7.1±6.3   | 0.476 |
| #163/164                | 16.7±15.4 | 14.2±13.6 | 0.261 |
| #138                    | 8.6±6.6   | 8.9±7.8   | 0.968 |
| #182/187                | 6.5±7.6   | 6.0±6.1   | 0.609 |
| #180                    | 10.3±9.1  | 10.3±8.3  | 0.745 |
| #170                    | 3.4±3.1   | 3.6±3.1   | 0.436 |

Supplemental Table S2. Comparison of the associated factors according to sperm concentration

|                                             | Sperm concentrations |                 |               | P-value |
|---------------------------------------------|----------------------|-----------------|---------------|---------|
|                                             | Normal (n=151)       | Moderate (n=40) | Severe (n=30) |         |
| <b>Materials used in work in the past</b>   |                      |                 |               |         |
| Pesticide (%)                               |                      |                 |               |         |
| Used                                        | 8.0%                 | 8.6%            | 4.2%          | 0.950   |
| Not used                                    | 89.6%                | 91.4%           | 95.8%         |         |
| Unknown                                     | 2.4%                 | 0.0%            | 0.0%          |         |
| PCB or dioxin (%)                           |                      |                 |               |         |
| Used                                        | 3.2%                 | 2.9%            | 4.2%          | 0.532   |
| Not used                                    | 89.6%                | 88.6%           | 79.2%         |         |
| Unknown                                     | 7.2%                 | 8.6%            | 16.7%         |         |
| Radioactive material (%)                    |                      |                 |               |         |
| Used                                        | 7.2%                 | 17.1%           | 8.3%          | 0.175   |
| Not used                                    | 90.4%                | 80.0%           | 83.3%         |         |
| Unknown                                     | 2.4%                 | 2.9%            | 8.3%          |         |
| <b>Things used for more than half a day</b> |                      |                 |               |         |
| Chlorine bleach, insecticide (%)            |                      |                 |               |         |
| None                                        | 88.2%                | 86.7%           | 79.2%         | 0.454   |
| 1-3 times/month or more                     | 11.8%                | 13.3%           | 20.8%         |         |
| Medical disinfectant (%)                    |                      |                 |               |         |
| None                                        | 91.0%                | 86.7%           | 75.0%         | 0.089   |
| 1-3 times/month or more                     | 9.0%                 | 13.3%           | 25.0%         |         |
| Permanent marker (%)                        |                      |                 |               |         |
| None                                        | 66.4%                | 56.7%           | 54.2%         | 0.397   |
| 1-3 times/month or more                     | 33.6%                | 43.3%           | 45.8%         |         |
| Aqueous magic inks, ink-jet printer (%)     |                      |                 |               |         |
| None                                        | 74.8%                | 55.2%           | 58.3%         | 0.061   |
| 1-3 times/month or more                     | 25.2%                | 44.8%           | 41.7%         |         |
| Organic solvent (%)                         |                      |                 |               |         |
| None                                        | 84.7%                | 83.3%           | 77.3%         | 0.657   |
| 1-3 times/month or more                     | 15.3%                | 16.7%           | 22.7%         |         |
| Copy machine, laser printer (%)             |                      |                 |               |         |
| None                                        | 53.2%                | 43.3%           | 41.7%         | 0.441   |
| 1-3 times/month or more                     | 46.8%                | 56.7%           | 58.3%         |         |
| Lubricating oil (%)                         |                      |                 |               |         |
| None                                        | 91.9%                | 96.7%           | 91.7%         | 0.736   |
| 1-3 times/month or more                     | 8.1%                 | 3.3%            | 8.3%          |         |
| Insecticide (%)                             |                      |                 |               |         |
| None                                        | 92.8%                | 86.7%           | 87.5%         | 0.418   |
| 1-3 times/month or more                     | 7.2%                 | 13.3%           | 12.5%         |         |
| Radioactive material, isotope (%)           |                      |                 |               |         |
| None                                        | 95.5%                | 86.7%           | 91.7%         | 0.168   |
| 1-3 times/month or more                     | 4.5%                 | 13.3%           | 8.3%          |         |
| <b>Dietary habit</b>                        |                      |                 |               |         |
| Meals (%)                                   |                      |                 |               |         |
| Twice per day                               | 23.4%                | 17.6%           | 8.3%          | 0.223   |
| Three times per day                         | 76.6%                | 82.4%           | 91.7%         |         |
| Eat regularly (%)                           |                      |                 |               |         |
| Yes                                         | 63.7%                | 73.5%           | 62.5%         | 0.538   |
| No                                          | 36.3%                | 26.5%           | 37.5%         |         |
| Rice daily averag (%)                       |                      |                 |               |         |
| 1 bowl/day or less                          | 32.3%                | 17.6%           | 37.5%         | 0.183   |
| 2-3 bowls/day or more                       | 67.7%                | 82.4%           | 62.5%         |         |
| Miso soup daily average (%)                 |                      |                 |               |         |
| 1 bowl/day or less                          | 70.2%                | 76.5%           | 66.7%         | 0.698   |
| 2 bowls/day or more                         | 29.8%                | 23.5%           | 33.3%         |         |
| Confections (%)                             |                      |                 |               |         |
| 1-2 times/week or less                      | 57.5%                | 66.7%           | 70.8%         | 0.361   |
| 3-4 times/week or more                      | 42.5%                | 33.3%           | 29.2%         |         |



|                         |       |       |       |       |
|-------------------------|-------|-------|-------|-------|
| Meat (%)                |       |       |       |       |
| 3-4 times/week or less  | 71.9% | 70.6% | 79.2% | 0.734 |
| 5-6 times/week or more  | 28.1% | 29.4% | 20.8% |       |
| Fish (%)                |       |       |       |       |
| 1-2 times/week or less  | 60.8% | 70.6% | 54.2% | 0.416 |
| 3-4 times/week or more  | 39.2% | 29.4% | 45.8% |       |
| Vegetable (%)           |       |       |       |       |
| 5-6 times/week or less  | 52.9% | 50.0% | 62.5% | 0.618 |
| Every day               | 47.1% | 50.0% | 37.5% |       |
| Fruit (%)               |       |       |       |       |
| 1-2 times/week or less  | 74.6% | 64.7% | 78.3% | 0.436 |
| 3-4 times/week or more  | 25.4% | 35.3% | 21.7% |       |
| Fry (%)                 |       |       |       |       |
| 1-2 times/week or less  | 62.8% | 50.0% | 43.5% | 0.133 |
| 3-4 times/week or more  | 37.2% | 50.0% | 56.5% |       |
| Eat out (%)             |       |       |       |       |
| 1-2 times/week or less  | 76.0% | 88.2% | 70.8% | 0.221 |
| 3-4 times/week or more  | 24.0% | 11.8% | 29.2% |       |
| Precooked food (%)      |       |       |       |       |
| 1-3 times/month or less | 60.0% | 60.6% | 58.3% | 0.984 |
| 1-2 times/week or more  | 40.0% | 39.4% | 41.7% |       |
| Soy food (%)            |       |       |       |       |
| 1-2 times/week or less  | 50.8% | 50.0% | 58.3% | 0.780 |
| 3-4 times/week or more  | 49.2% | 50.0% | 41.7% |       |
| Vitamin compound (%)    |       |       |       |       |
| Currently taking        | 11.7% | 8.8%  | 16.7% | 0.639 |
| Never take              | 88.3% | 91.2% | 83.3% |       |
| Milk (%)                |       |       |       |       |
| 1-3 times/month or less | 61.7% | 67.6% | 58.3% | 0.743 |
| 1-2 times/week or more  | 38.3% | 32.4% | 41.7% |       |
| Green tea (%)           |       |       |       |       |
| 3-4 times/week or less  | 55.0% | 51.4% | 54.2% | 0.933 |
| 5-6 times/week or more  | 45.0% | 48.6% | 45.8% |       |
| Oolong tea (%)          |       |       |       |       |
| 1-3 times/month or less | 59.2% | 58.8% | 58.3% | 0.997 |
| 1-2 times/week or more  | 40.8% | 41.2% | 41.7% |       |
| 100% fruit juice (%)    |       |       |       |       |
| 1-3 times/month or less | 75.8% | 73.5% | 79.2% | 0.885 |
| 1-2 times/week or more  | 24.2% | 26.5% | 20.8% |       |
| Vegetable juice (%)     |       |       |       |       |
| 1-3 times/month or less | 80.0% | 76.5% | 82.6% | 0.841 |
| 1-2 times/week or more  | 20.0% | 23.5% | 17.4% |       |
| Lactin acid drink (%)   |       |       |       |       |
| 1-3 times/month or less | 80.8% | 85.3% | 66.7% | 0.194 |
| 1-2 times/week or more  | 19.2% | 14.7% | 33.3% |       |
| Sports drink (%)        |       |       |       |       |
| 1-3 times/month or less | 72.5% | 67.6% | 66.7% | 0.767 |
| 1-2 times/week or more  | 27.5% | 32.4% | 33.3% |       |
| Coffee (%)              |       |       |       |       |
| 5-6 times/week or less  | 55.4% | 48.6% | 33.3% | 0.135 |
| Every day               | 44.6% | 51.4% | 66.7% |       |
| Carbonated drink (%)    |       |       |       |       |
| 1-2 times/week or less  | 81.5% | 84.8% | 62.5% | 0.077 |
| 3-4 times/week or more  | 18.5% | 15.2% | 37.5% |       |

---
